# Supplementary material for: Liposome-assisted enzyme catalysis: toward signal amplification for sensitive split-type electrochemiluminescence immunoassay
Source: Royal Society of Chemistry journal article supplement (doi:10.1039/d1an00442e), 2021-01-01
Supplement: d1an00442e1.pdf [file d1an00442e1.pdf]

## Supplementary Materials

### **Liposome-assisted enzyme catalysis: toward signal amplification for sensitive split-type electrochemiluminescence immunoassay**

Yi-Zhuo Fu<sup>a</sup>, Xiang-Mei Liu<sup>a</sup>, Shu-Hui Ma<sup>b</sup>, Jun-Tao Cao<sup>a,\*</sup>, and Yan-Ming Liu<sup>a,\*</sup>

*<sup>a</sup>College of Chemistry and Chemical Engineering, Institute for Conservation and Utilization of Agro-bioresources in Dabie Mountains, Xinyang Normal University, Xinyang 464000, China*

*<sup>b</sup>Xinyang Central Hospital, Xinyang 464000, China*

\*Corresponding author: E-mail: liuym9518@sina.com (Y.-M. Liu) and jtcao11@163.com (J.-T. Cao), Tel & fax: +86-376-6392889.

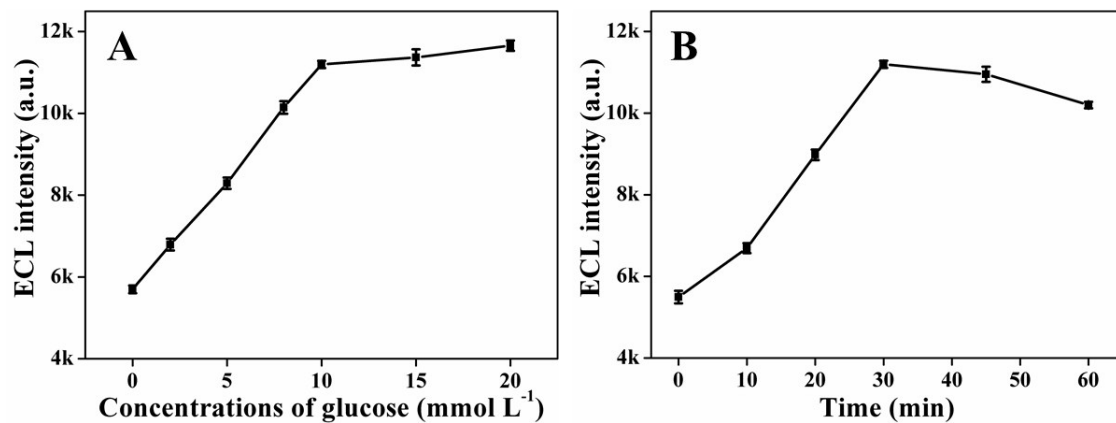

**Fig. S1.** Effects of the glucose concentration (A) and the reaction time (B) between GOx and glucose on ECL response. Working solution: (A) 0.1 mol L<sup>-1</sup>, pH 7.4 PBS containing  $1.0 \times 10^{-4}$  mol L<sup>-1</sup> luminol and different concentrations of glucose. (B) 0.1 mol L<sup>-1</sup>, pH 7.4 PBS containing  $1.0 \times 10^{-4}$  mol L<sup>-1</sup> luminol and 0.01 mol L<sup>-1</sup> glucose. scan rate: 100 mV s<sup>-1</sup>, scan range: -0.2–0.8 V.

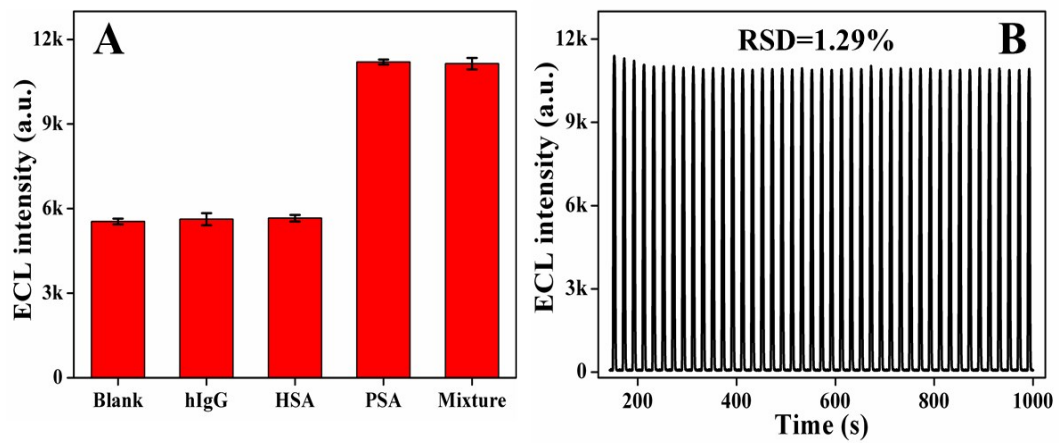

**Fig. S2.** (A) Selectivity of the ECL immunoassay against  $1.0 \times 10^{-8}$  g mL<sup>-1</sup> PSA, 0.04 g mL<sup>-1</sup> HSA, and 0.01 g mL<sup>-1</sup> hIgG; (B) Stability of the designed sensor.

**Table S1.** Analytical results of PSA in seven human serum samples using the proposed method and the reference method.

| Serum samples | Reference work<br>(ng mL <sup>-1</sup> ) | This method<br>(ng mL <sup>-1</sup> ) | Relative errors<br>(%) | RSDs<br>( <i>n</i> = 3, %) |
|---------------|------------------------------------------|---------------------------------------|------------------------|----------------------------|
| 1             | 0.54                                     | 0.52                                  | -3.7                   | 1.4                        |
| 2             | 19.93                                    | 20.99                                 | 5.3                    | 2.3                        |
| 3             | 1.67                                     | 1.73                                  | 3.6                    | 3.4                        |
| 4             | 10.88                                    | 10.48                                 | -3.7                   | 5.4                        |
| 5             | 1.29                                     | 1.37                                  | 6.2                    | 3.7                        |
| 6             | 1.45                                     | 1.53                                  | 5.5                    | 2.5                        |
| 7             | 25.74                                    | 26.43                                 | 2.7                    | 3.9                        |

**Table S2.** Recoveries of PSA in two human serum samples.

| Sample No. | Found<br>(ng mL <sup>-1</sup> ) | Added<br>(ng mL <sup>-1</sup> ) | Total found<br>(ng mL <sup>-1</sup> ) | Recoveries<br>(%) | RSDs<br>( <i>n</i> = 3, %<br>) |
|------------|---------------------------------|---------------------------------|---------------------------------------|-------------------|--------------------------------|
| 1          | 1.45                            | 0.1                             | 1.56                                  | 110.0             | 6.6                            |
|            |                                 | 1.0                             | 2.34                                  | 89.0              | 4.9                            |
|            |                                 | 10.0                            | 10.95                                 | 95.0              | 4.5                            |
| 2          | 19.93                           | 0.1                             | 20.03                                 | 100.0             | 3.2                            |
|            |                                 | 1.0                             | 20.83                                 | 90.0              | 3.5                            |
|            |                                 | 10.0                            | 31.23                                 | 113.0             | 4.2                            |
